# Supplementary material for: Improvements in clinical signs of Parkinson’s disease using photobiomodulation: A prospective proof-of-concept study
Source: bioRxiv or medRxiv preprint supplement (doi:10.1101/2021.05.26.21257833), 2021-05-29
Supplement: Supplementary file [file media-2.pdf]

**Supplementary Table 2.** Mean (st dev) of measures of fine motor control, gait, balance and cognition before PBM treatment in a second study of PD treatment with PBM

|                                   | Before treatment |
|-----------------------------------|------------------|
| <b>Gait tests</b>                 |                  |
| 10MWT walk speed (m/sec)          | 1.69 (0.51) n=7  |
| 10MWT stride length (m)           | 0.97 (0.24) n=7  |
| TUG (s)                           | 7.2 (2.42) n=7   |
| TUG motor (s)                     | 8.1 (1.85) n=7   |
| TUG cognitive (s)                 | 8.4 (2.33) n=7   |
| <b>Dynamic Balance test</b>       |                  |
| Step test - affected leg (n)      | 15.3 (4.03) n=7  |
| Step test - unaffected leg (n)    | 16.6 (5.02) n=7  |
| <b>Cognition test</b>             |                  |
| MoCA                              | 25.7 (3.08) n=6  |
| <b>Fine Motor Skill tests</b>     |                  |
| NHPT - affected hand (sec)        | 29.9 (7.60) n=6  |
| NHPT - unaffected hand (sec)      | 26.4 (4.79) n=6  |
| Spiral test - dominant hand (sec) | 25.6 (9.78) n=6  |
| <b>Static Balance</b>             |                  |
| TS affected leg behind (sec)      | 14.9 (17.70) n=7 |
| TS unaffected leg behind (sec)    | 13.0 (10.94) n=7 |
| SLS affected leg raised (sec)     | 7.4 (10.25) n=7  |
| SLS unaffected leg raised (sec)   | 8.9 (10.59) n=7  |

10MWT = 10 metre walk test; TUG = Timed-up-and-go; MoCA: Montreal Cognitive Assessment; NHPT = nine-hole peg test; TS = tandem stance (eyes closed); SLS: single leg stance (eyes closed)
