# Supplementary material for: Improvements in clinical signs of Parkinson’s disease using photobiomodulation: A prospective proof-of-concept study
Source: bioRxiv or medRxiv preprint supplement (doi:10.1101/2021.05.26.21257833), 2021-05-29
Supplement: Supplementary file [file media-3.pdf]

**Supplementary Table 3. Individual data for participants before and after treatment with the photobiomodulation protocols.**

|                                    | GROUP AA PARTICIPANTS |             |             |              |             |              | GROUP AB PARTICIPANTS |             |              |             |             |             |
|------------------------------------|-----------------------|-------------|-------------|--------------|-------------|--------------|-----------------------|-------------|--------------|-------------|-------------|-------------|
|                                    | AA1                   | AA2         | AA3         | AA4          | AA5         | AA6          | AB1                   | AB2         | AB3          | AB4         | AB5         | AB6         |
| <b>NHPT (seconds)</b>              |                       |             |             |              |             |              |                       |             |              |             |             |             |
| <b>affected hand</b>               |                       |             |             |              |             |              |                       |             |              |             |             |             |
| 12 weeks prior to treatment        |                       |             |             |              |             |              | 29.0                  | 45.8        | 19.6         | 25.1        | 21.0        | 24.0        |
| immediately before treatment       | 22.5                  | 23.0        | 21.2        | 26.1         | 21.5        | 21.6         | 22.2 (23%)            | 56.5 (-23%) | 19.5 (1%)    | 31.3 (-24%) | 22.3 (-6%)  | 22.8 (5%)   |
| after 4 weeks treatment (CT)       |                       |             |             |              |             |              | 25.8 (11%)            | 48.2 (-5%)  | 21.5 (-10%)  | 25.7 (-2%)  | 22.3 (-6%)  | 19.2 (20%)  |
| after 12 weeks treatment (CT)      | 21.1 (6%)             | 28.6 (-24%) | 28.0 (-32%) | 37.1 (-42%)  | 17.9 (17%)  | 27.1 (-25%)  | 27.9 (4%)             | 47.6 (-4%)  | 20.5 (-4%)   | 34.8 (-38%) | 24.1 (-15%) | 23.2 (3%)   |
| after 26/38 week home treatm       | 21.8 (3%)             |             |             | 27.3 (-5%)   | 21.6 (0%)   | 29.6 (-37%)  | 29.4 (-1%)            | 69.9 (-53%) | 22.0 (-12%)  | 23.4 (7%)   | 16.4 (22%)  | 24.4 (-2%)  |
| <b>dominant hand</b>               |                       |             |             |              |             |              |                       |             |              |             |             |             |
| 12 weeks prior to treatment        |                       |             |             |              |             |              | 20.1                  | 30.2        | 19.6         | 24.1        | 21.9        | 24.0        |
| immediately before treatment       | 29.3                  | 18.1        | 33.7        | 26.4         | 16.0        | 25.7         | 18.0 (11%)            | 29.1 (4%)   | 19.5 (1%)    | 26.6 (-10%) | 17.9 (18%)  | 22.8 (5%)   |
| after 4 weeks treatment (CT)       |                       |             |             |              |             |              | 16.5 (18%)            | 24.9 (18%)  | 21.5 (-10%)  | 26.8 (-11%) | 18.7 (15%)  | 19.2 (20%)  |
| after 12 weeks treatment (CT)      | 25.8 (12%)            | 17.9 (1%)   | 27.7 (18%)  | 26.8 (-2%)   | 17.7 (-10%) | 20.0 (22%)   | 25.5 (-27%)           | 28.3 (6%)   | 20.5 (-4%)   | 28.8 (-20%) | 20.1 (8%)   | 23.2 (3%)   |
| after 26/38 week home treatm       | 21.8 (26%)            |             |             | 27.9 (-6%)   | 17.0 (-6%)  | 27.1 (-5%)   | 17.1 (15%)            | 29.6 (2%)   | 20.1 (-2%)   | 28.8 (-20%) | 21.4 (2%)   | 22.5 (6%)   |
| <b>SPIRAL TEST (seconds)</b>       |                       |             |             |              |             |              |                       |             |              |             |             |             |
| <b>dominant hand</b>               |                       |             |             |              |             |              |                       |             |              |             |             |             |
| 12 weeks prior to treatment        |                       |             |             |              |             |              | 32.4                  | 37.5        | 48.6         | 33.9        | 29.3        | 36.5        |
| immediately before treatment       | 20.4                  | 23.8        | 29.3        | 52.5         | 22.6        | 26.2         | 29.6 (9%)             | 38.2 (-2%)  | 28.7 (41%)   | 42.0 (-24%) | 20.7 (29%)  | 40.3 (-10%) |
| after 4 weeks treatment (CT)       |                       |             |             |              |             |              | 19.4 (40%)            | 30.8 (18%)  | 18.7 (61%)   | 41.7 (-23%) | 23.7 (19%)  | 31.2 (15%)  |
| after 12 weeks treatment (CT)      | 16.8 (18%)            | 23.7 (0%)   | 31.9 (-9%)  | 23.2 (56%)   | 16.5 (27%)  | 21.1 (19%)   | 28.9 (11%)            | 29.9 (20%)  | 29.1 (40%)   | 45.9 (-35%) | 14.1 (52%)  | 21.7 (41%)  |
| after 26/38 week home treatm       | 17.8 (13%)            | 27.6 (-16%) |             | 44.2 (16%)   | 17.4 (23%)  | 14.9 (43%)   | 34.4 (-6%)            | 34.2 (9%)   | 19.8 (59%)   | 35.9 (-6%)  | 21.1 (28%)  | 27.9 (24%)  |
| <b>STEP TEST (number of steps)</b> |                       |             |             |              |             |              |                       |             |              |             |             |             |
| <b>affected foot</b>               |                       |             |             |              |             |              |                       |             |              |             |             |             |
| 12 weeks prior to treatment        |                       |             |             |              |             |              | 17                    | 11          | 14           | 9           | 9           | 7           |
| immediately before treatment       | 12                    | 12          | 8           | 14           | 18          | 14           | 21 (24%)              | 12 (9%)     | 15 (7%)      | 13 (44%)    | 13 (44%)    | 15 (114%)   |
| after 4 weeks treatment (CT)       |                       |             |             |              |             |              | 23 (35%)              | 14 (27%)    | 17 (21%)     | 15 (67%)    | 15 (67%)    | 14 (100%)   |
| after 12 weeks treatment (CT)      | 15 (25%)              | 18 (50%)    | 11 (38%)    | 20 (43%)     | 23 (28%)    | 17 (21%)     | 23 (35%)              | 14 (27%)    | 19 (36%)     | 11 (22%)    | 16 (78%)    | 15 (114%)   |
| after 26/38 week home treatm       | 15 (25%)              | nd          | nd          | 18 (29%)     | 21 (17%)    | 17 (21%)     | 20 (18%)              | 12 (9%)     | 21 (50%)     | 11 (22%)    | 18 (100%)   | 14 (100%)   |
| <b>dominant foot</b>               |                       |             |             |              |             |              |                       |             |              |             |             |             |
| 12 weeks prior to treatment        |                       |             |             |              |             |              | 12                    | 10          | 14           | 11          | 12          | 7           |
| immediately before treatment       | 12                    | 11          | 9           | 12           | 20          | 14           | 18 (50%)              | 12 (20%)    | 15 (7%)      | 11 (0%)     | 12 (0%)     | 15 (114%)   |
| after 4 weeks treatment (CT)       |                       |             |             |              |             |              | 21 (75%)              | 12 (20%)    | 17 (21%)     | 15 (36%)    | 15 (25%)    | 14 (100%)   |
| after 12 weeks treatment (CT)      | 14 (17%)              | 18 (64%)    | 11 (22%)    | 16 (33%)     | 22 (10%)    | 17 (21%)     | 21 (75%)              | 12 (20%)    | 19 (36%)     | 13 (18%)    | 17 (42%)    | 15 (114%)   |
| after 26/38 week home treatm       | 14 (17%)              | nd          | nd          | 20 (67%)     | 21 (5%)     | 17 (21%)     | 24 (100%)             | 13 (30%)    | 21 (50%)     | 13 (18%)    | 19 (58%)    | 14 (100%)   |
| <b>TS (seconds)</b>                |                       |             |             |              |             |              |                       |             |              |             |             |             |
| <b>affected foot behind</b>        |                       |             |             |              |             |              |                       |             |              |             |             |             |
| 12 weeks prior to treatment        |                       |             |             |              |             |              | 8.0                   | 0.0         | 2.0          | 4.0         | 2.0         | 0.0         |
| immediately before treatment       | 30.0                  | 12.0        | 0.0         | 0.0          | 1.0         | 6.0          | 8.0 (0%)              | 1.0         | 7.5 (275%)   | 14.0 (250%) | 3.6 (80%)   | 0.0         |
| after 4 weeks treatment (CT)       |                       |             |             |              |             |              | 30.0 (275%)           | 4.7         | 30.0 (1400%) | 30.0 (650%) | 9.0 (350%)  | 2.7         |
| after 12 weeks treatment (CT)      | 30.0                  | 30.0 (150%) | 9.5         | 0.0          | 2.0 (100%)  | 2.0 (-67%)   | 15.0 (88%)            | 1.0         | 5.6 (180%)   | 30.0 (650%) | 6.0 (200%)  | 1.0         |
| after 26/38 week home treatm       | 30.0                  | nd          | nd          | 0.0          | 4.0 (300%)  | 3.9 (-34%)   | 30.0 (275%)           | nd          | 30.0 (1400%) | 3.9 (-2%)   | 3.4 (70%)   | 3.0         |
| <b>unaffected foot behind</b>      |                       |             |             |              |             |              |                       |             |              |             |             |             |
| 12 weeks prior to treatment        |                       |             |             |              |             |              | 1.0                   | 0.0         | 1.0          | 7.0         | 4.0         | 0.0         |
| immediately before treatment       | 30.0                  | 2.0         | 0.0         | 0.0          | 4.0         | 7.0          | 9.2 (820%)            | 0.0         | 4.3 (330%)   | 4.0 (-43%)  | 13.0 (225%) | 0.0         |
| after 4 weeks treatment (CT)       |                       |             |             |              |             |              | 30.0 (2900%)          | 3.1         | 3.0 (200%)   | 30.0 (329%) | 3.0 (-25%)  | 3.3         |
| after 12 weeks treatment (CT)      | 24.3 (-19%)           | 30.0 #####  | 2.3         | 1.0          | 3.0 (-25%)  | 6.0 (-14%)   | 30.0 (2900%)          | 2.5         | 2.0 (100%)   | 20.0 (186%) | 2.0 (-50%)  | 1.0         |
| after 26/38 week home treatm       | 30.0 (0%)             | nd          | nd          | 0.0          | 2.7 (-33%)  | 3.9 (-44%)   | 30.0 (2900%)          | nd          | 10.7 (972%)  | 30.0 (329%) | 3.4 (-15%)  | 3.2         |
| <b>SLS (seconds)</b>               |                       |             |             |              |             |              |                       |             |              |             |             |             |
| <b>affected foot raised</b>        |                       |             |             |              |             |              |                       |             |              |             |             |             |
| 12 weeks prior to treatment        |                       |             |             |              |             |              | 8.9                   | 0.0         | 0.0          | 1.0         | 2.0         | 2.0         |
| immediately before treatment       | 6.0                   | 2.0         | 5.0         | 0.0          | 8.0         | 1.0          | 2.0 (-78%)            | 0.0         | 1.1          | 3.1 (210%)  | 2.0 (0%)    | 1.0 (-50%)  |
| after 4 weeks treatment (CT)       |                       |             |             |              |             |              | 30.0 (237%)           | 0.1         | 1.3          | 1.6 (60%)   | 0.0         | 1.0 (-50%)  |
| after 12 weeks treatment (CT)      | 2.6 (-57%)            | 14.0 (600%) | 0.0         | 0.0          | 0.0         | 2.0 (100%)   | 10.0 (12%)            | 0.0         | 1.6          | 5.4 (440%)  | 0.0         | 0.0         |
| after 26/38 week home treatm       | 3.9 (-35%)            | nd          | nd          |              | 5.4 (-32%)  | 1.9 (90%)    | 23.2 (161%)           | nd          | 5.0          | 2.1 (110%)  | nd          | nd          |
| <b>unaffected foot raised</b>      |                       |             |             |              |             |              |                       |             |              |             |             |             |
| 12 weeks prior to treatment        |                       |             |             |              |             |              | 4.9                   | 0.0         | 0.0          | 1.0         | 1.0         | 1.0         |
| immediately before treatment       | 5.0                   | 2.0         | 3.0         | 1.0          | 3.0         | 2.2          | 12.0 (145%)           | 0.0         | 2.1          | 3.1 (210%)  | 2.0 (100%)  | 0.7 (-30%)  |
| after 4 weeks treatment (CT)       |                       |             |             |              |             |              | 6.7 (37%)             | 0.1         | 0.1          | 1.6 (60%)   | 0.0         | 0.0         |
| after 12 weeks treatment (CT)      | 2.4 (-52%)            | 2.7 (35%)   | 0.0         | 12.3 (1130%) | 0.0         | 1.0 (-55%)   | 26.0 (431%)           | 0.0         | 1.7          | 5.4 (440%)  | 0.0         | 0.0         |
| after 26/38 week home treatm       | 18.9 (278%)           | nd          | nd          |              | 30.0 (900%) | 30.0 (1264%) | 30.0 (512%)           | nd          | 5.0          | 2.1 (110%)  | nd          | nd          |
| <b>WALK SPEED (metres/second)</b>  |                       |             |             |              |             |              |                       |             |              |             |             |             |
| 12 weeks prior to treatment        |                       |             |             |              |             |              | 1.22                  | 1.03        | 1.62         | 1.20        | 1.33        | 0.76        |
| immediately before treatment       | 1.00                  | 0.86        | 0.57        | 1.03         | 1.33        | 1.20         | 1.76 (44%)            | 1.54 (50%)  | 1.88 (16%)   | 1.94 (61%)  | 1.90 (43%)  | 1.50 (98%)  |
| after 4 weeks treatment (CT)       |                       |             |             |              |             |              | 1.94 (58%)            | 1.62 (58%)  | 2.00 (23%)   | 1.94 (61%)  | 2.04 (53%)  | 1.55 (104%) |
| after 12 weeks treatment (CT)      | 1.54 (54%)            | 1.62 (89%)  | 0.79 (39%)  | 1.67 (61%)   | 1.94 (45%)  | 1.71 (43%)   | 1.94 (58%)            | 1.60 (56%)  | 2.21 (36%)   | 1.94 (61%)  | 1.96 (47%)  | 1.50 (98%)  |
| after 26/38 week home treatm       | 1.72 (72%)            | nd          | nd          | 1.33 (29%)   | 1.75 (32%)  | 1.09 (-9%)   | 2.07 (69%)            | 1.69 (64%)  | 2.54 (57%)   | 1.93 (61%)  | 2.00 (50%)  | 1.54 (103%) |
| <b>WALK STRIDE LENGTH (metres)</b> |                       |             |             |              |             |              |                       |             |              |             |             |             |
| 12 weeks prior to treatment        |                       |             |             |              |             |              | 0.5                   | 0.5         | 0.5          | 0.6         | 0.6         | 0.5         |
| immediately before treatment       | 0.5                   | 0.5         | 0.4         | 0.5          | 0.6         | 0.5          | 0.6 (20%)             | 0.7 (33%)   | 0.8 (38%)    | 0.9 (43%)   | 0.6 (0%)    | 0.7 (33%)   |
| after 4 weeks treatment (CT)       |                       |             |             |              |             |              | 0.4 (-20%)            | 0.8 (50%)   | 0.7 (22%)    | 0.9 (43%)   | 0.8 (25%)   | 0.7 (33%)   |
| after 12 weeks treatment (CT)      | 0.7 (22%)             | 0.5 (18%)   | 0.5 (8%)    | 0.7 (33%)    | 0.5 (-23%)  | 0.8 (38%)    | 0.7 (33%)             | 0.7 (33%)   | 0.8 (38%)    | 0.9 (43%)   | 0.8 (25%)   | 0.7 (33%)   |
| after 26/38 week home treatm       | 0.8 (38%)             | nd          | nd          | 0.6 (20%)    | 0.8 (25%)   | 0.7 (22%)    | 0.8 (50%)             | 0.7 (33%)   | 0.8 (38%)    | 0.8 (25%)   | 0.8 (25%)   | 0.8 (50%)   |
| <b>TUG (seconds)</b>               |                       |             |             |              |             |              |                       |             |              |             |             |             |
| 12 weeks prior to treatment        |                       |             |             |              |             |              | 7.9                   | 9.7         | 6.8          | 7.6         | 7.8         | 13.8        |
| immediately before treatment       | 10.2                  | 8.0         | 18.0        | 11.0         | 6.5         | 7.5          | 7.4 (6%)              | 8.5 (12%)   | 6.5 (4%)     | 7.3 (4%)    | 6.7 (14%)   | 9.3 (33%)   |
| after 4 weeks treatment (CT)       |                       |             |             |              |             |              | 6.4 (19%)             | 7.4 (24%)   | 6.3 (7%)     | 6.6 (13%)   | 6.5 (17%)   | 7.9 (43%)   |
| after 12 weeks treatment (CT)      | 8.4 (18%)             | 7.1 (11%)   | 15.5 (14%)  | 8.5 (23%)    | 5.2 (20%)   | 6.6 (12%)    | 6.6 (16%)             | 7.6 (22%)   | 5.9 (13%)    | 7.1 (6%)    | 6.3 (19%)   | 7.6 (45%)   |
| after 26/38 week home treatm       | 8.1 (21%)             | nd          | nd          | 9.9 (10%)    | 6.0 (7%)    | 5.8 (23%)    | 6.6 (16%)             | 8.0 (18%)   | 6.3 (7%)     | 6.6 (13%)   | 5.9 (24%)   | 7.9 (43%)   |
| <b>TUG MOTOR (seconds)</b>         |                       |             |             |              |             |              |                       |             |              |             |             |             |
| 12 weeks prior to treatment        |                       |             |             |              |             |              | 8.8                   | 9.0         | 6.9          | 7.6         | 8.3         | 11.8        |
| immediately before treatment       | 10.9                  | 8.2         | 17.7        | 10.6         | 7.1         | 7.2          | 8.2 (7%)              | 8.1 (10%)   | 6.5 (6%)     | 8.3 (-9%)   | 6.4 (23%)   | 9.1 (23%)   |
| after 4 weeks treatment (CT)       |                       |             |             |              |             |              | 7.4 (16%)             | 7.2 (20%)   | 6.6 (4%)     | 6.9 (9%)    | 6.4 (23%)   | 8.3 (30%)   |
| after 12 weeks treatment (CT)      | 8.8 (19%)             | 8.2 (0%)    | 16.5 (7%)   | 9.3 (12%)    | 6.6 (7%)    | 7.0 (3%)     | 6.4 (27%)             | 8.5 (6%)    | 6.3 (9%)     | 7.1 (7%)    | 6.6 (20%)   | 8.1 (31%)   |
| after 26/38 week home treatm       | 8.4 (23%)             | nd          | nd          | 13.3 (-26%)  | 6.1 (14%)   | 6.4 (11%)    | 6.0 (32%)             | 9.2 (-2%)   | 7.0 (-1%)    | 6.8 (10%)   | 5.8 (30%)   | 8.4 (29%)   |
| <b>TUG COGNITIVE (seconds)</b>     |                       |             |             |              |             |              |                       |             |              |             |             |             |
| 12 weeks prior to treatment        |                       |             |             |              |             |              | 10.3                  | 10.6        | 7.2          | 8.7         | 8.8         | 13.8        |
| immediately before treatment       | 12.0                  | 10.4        | 23.7        | 10.5         | 6.0         | 7.6          | 7.5 (27%)             | 8.8 (17%)   | 7.3 (-1%)    | 7.5 (14%)   | 6.7 (24%)   | 9.0 (35%)   |
| after 4 weeks treatment (CT)       |                       |             |             |              |             |              | 7.2 (30%)             | 8.2 (23%)   | 6.7 (7%)     | 6.6 (24%)   | 6.2 (30%)   | 8.7 (37%)   |
| after 12 weeks treatment (CT)      | 9.3 (23%)             | 6.9 (34%)   | 18.2 (23%)  | 9.3 (11%)    | 5.2 (14%)   | 6.8 (11%)    | 6.3 (39%)             | 8.9 (16%)   | 6.4 (11%)    | 6.8 (22%)   | 6.8 (23%)   | 8.1 (41%)   |
| after 26/38 week home treatm       | 8.8 (26%)             | nd          | nd          | 9.8 (6%)     | 5.2 (13%)   | 5.9 (22%)    | 6.7 (35%)             | 9.5 (11%)   | 6.5 (10%)    | 6.4 (27%)   | 6.6 (25%)   | 8.8 (36%)   |
| <b>MoCA score</b>                  |                       |             |             |              |             |              |                       |             |              |             |             |             |
| 12 weeks prior to treatment        |                       |             |             |              |             |              | 26                    | 28          | 27           | 26          | 24          | 21          |
| immediately before treatment       | 24                    | 26          | 26          | 28           | 27          | 24           | 29 (12%)              | 29 (4%)     | 27 (0%)      | 26 (0%)     | 28 (17%)    | 24 (14%)    |
| after 4 weeks treatment (CT)       |                       |             |             |              |             |              | 28 (8%)               | 30 (7%)     | 28 (4%)      | 26 (0%)     | 28 (17%)    | 25 (19%)    |
| after 12 weeks treatment (CT)      | 25 (4%)               | 26 (0%)     | 28 (8%)     | 28 (0%)      | 27 (0%)     | 29 (21%)     | 29 (12%)              | 30 (7%)     | 27 (0%)      | 27 (4%)     | 29 (21%)    | 29 (38%)    |
| after 26/38 week home treatm       | 29 (21%)              | 29 (12%)    | nd          | 30 (7%)      | 28.7 (6%)   | 30 (24%)     | 30 (15%)              | 30 (7%)     | 30 (11%)     | 28.7 (10%)  | 30 (25%)    | nd          |

NHPT = nine-hole peg test

TS = tandem stance (eyes closed)

SLS = single leg stance (eyes closed)

TUG = timed up-and-go

MoCA = Montreal Cognitive Assessment

number in brackets is the percentage improvement (positive value) or decline (negative value) in an outcome measure
